# Supplementary material for: Improved Peripheral and Hepatic Insulin Sensitivity after Lifestyle Interventions in Type 2 Diabetes Is Associated with Specific Metabolomic and Lipidomic Signatures in Skeletal Muscle and Plasma
Source: Metabolites. 2021 Dec 3;11(12):834. doi: 10.3390/metabo11120834 (PMC8708788; doi:10.3390/metabo11120834)
Supplement: Supplementary file 1 [file metabolites-11-00834-s001.zip › Supplementary Table 1.xlsx]

## Sheet: MUSCLE METABOLITES AND LIPIDS
Primary ID	RI	M/z (unique)	PLATFORM
2-Methylmalic acid	1483	305	GC-MS
GLYCERIC ACID-3-PHOSPHATE	1797	460	GC-MS
GLUCARIC ACID 1,4 LACTONE	1966	218	GC-MS
4-HYDROXYBENZOIC ACID	1623	223	GC-MS
BENZOIC ACID	1253	180	GC-MS
CHLOROGENIC ACID	2979	309	GC-MS
CREATININE	1550	331	GC-MS
PANTOTHENIC ACID	1982	291	GC-MS
ASYMETRICAL-N,N-DIMETHYLARGININE (ADMA)	1817	256	GC-MS
NICOTINAMIDE	1480	180	GC-MS
UREA	1191	171	GC-MS
PYROGLUTAMIC ACID	1518	158	GC-MS
ACETAMINOPHEN	1625	280	GC-MS
LIDOCAINE	1746	220	GC-MS
NAPROXEN	2081	185	GC-MS
LACTIC ACID	1081	148	GC-MS
FUMARIC ACID	1351	247	GC-MS
SUCCINIC ACID	1316	248	GC-MS
MALIC ACID	1483	337	GC-MS
3-HYDROXYBUTYRIC ACID	1173	233	GC-MS
ALPHA-KETOGLUTARIC ACID	1569	305	GC-MS
ADIPIC ACID	1502	111	GC-MS
CITRIC ACID	1810	466	GC-MS
ASCORBIC ACID	1927	157	GC-MS
MALEIC ACID	1315	248	GC-MS
ISOCITRIC ACID	1809	466	GC-MS
ALANINE	1121	218	GC-MS
ALLOTHREONINE	1383	321	GC-MS
LYSINE	1915	435	GC-MS
CITRULLINE	1817	256	GC-MS
GLYCINE	1307	278	GC-MS
GLUTAMIC ACID	1612	320	GC-MS
ISOLEUCINE	1295	232	GC-MS
VALINE	1222	220	GC-MS
ORNITHINE	1810	420	GC-MS
GLUTAMINE	1769	230	GC-MS
SERINE	1359	306	GC-MS
TAURINE	1662	328	GC-MS
THREONINE	1383	320	GC-MS
ARGININE	1817	256	GC-MS
KYNURENINE	2182	192	GC-MS
TYROSINE	1931	280	GC-MS
ALPHA-TOCOPHEROL	3134	503	GC-MS
GALACTOSE	1888	321	GC-MS
MANNOSE	1888	321	GC-MS
SORBITOL	1927	321	GC-MS
MALTOSE	2728	361	GC-MS
TURANOSE	2726	219	GC-MS
FRUCTOSE	1862	217	GC-MS
CELLOBIOSE	2727	204	GC-MS
FRUCTOSE-6-PHOSPHATE	2295	461	GC-MS
GLUCOSE	1889	321	GC-MS
GLUCOSE-6-PHOSPHATE	2308	389	GC-MS
MANNITOL	1907	321	GC-MS
GLYCEROL-2-PHOSPHATE	1715	446	GC-MS
INOSITOL, myo	2083	305	GC-MS
N-ACETYL GLUCOSAMINE	2083	321	GC-MS
SQUALENE	2810	137	GC-MS
ADENOSINE-5-MONOPHOSPHATE	3054	382	GC-MS
INOSINE	2561	282	GC-MS
N-ACETYLORNTHINE	2003	174	GC-MS
SARCOSINE	1121	218	GC-MS
INOSITOL, scyllo	2018	393	GC-MS
INOSITOL, allo	1887	306	GC-MS
PHOSPHATE-FRAGMENT	1275	299	GC-MS
GLUCONIC ACID 1,4-LACTONE	1887	66	GC-MS
SORBITOL-6-PHOSPHATE	2328	191	GC-MS
TREHALOSE	2728	361	GC-MS
OCTADECENOIC ACID,-9-(Z)	2212	339	GC-MS
NONANOIC ACID	1361	201	GC-MS
DODECANOIC ACID	1650	258	GC-MS
OCTADECADIENOIC ACID, 9,12-(Z,Z)	2205	337	GC-MS
EICOSATETRAENOIC ACID, 5,8,11,14-(Z,Z,Z,Z,)	2362	145	GC-MS
PALMITOLEIC ACID	2019	117	GC-MS
OCTADECANOIC ACID	2238	356	GC-MS
Octadecanoic acid methyl ester	2123	298	GC-MS
Heptadecanoic acid methyl ester	2040	199	GC-MS
EICOSAPENTAENOIC ACID, 5,8,11,14,17-(Z,Z,Z,Z,Z)	2363	108	GC-MS
CHOLESTEROL	3154	353	GC-MS
1-PALMITOYL-sn-GLYCERO-3-PHOSPHOCHOLINE	3028	299	GC-MS
1-STEAROYL-sn-GLYCERO-3-PHOSPHOCHOLINE	3219	299	GC-MS
Cer(d18:1/20:4)	2.89	585.5	LC-MS
Cer(d18:0/23:1)	2.65	635.618	LC-MS
Cer(d18:1/23:0)	3.47	635.611	LC-MS
Cer(d18:0/23:0)	4.01	637.632	LC-MS
Cer(d18:0/24:3)	5.05	645.605	LC-MS
Cer(d18:1/24:1)	6.01	647.619	LC-MS
Cer(d18:1/24:0)	6.81	649.635	LC-MS
GalCer(d18:1/23:1)	4.5	795.651	LC-MS
DG(30:0)	4.11	540.477	LC-MS
DG(33:5)	2.07	572.44	LC-MS
DG(34:3)	3.67	590.505	LC-MS
DG(34:2)	4.11	592.493	LC-MS
DG(34:1)	4.8	594.521	LC-MS
DG(36:2)	4.9	620.535	LC-MS
DG(38:4)	4.83	644.538	LC-MS
DG(38:3)	5.3	646.567	LC-MS
DG(40:6)	4.54	668.532	LC-MS
PC(30:0)	2.93	705.548	LC-MS
PC(32:2)	2.62	729.534	LC-MS
PC(32:1)	2.88	731.547	LC-MS
PC(32:0)	3.24	733.556	LC-MS
PC(O-34:3)	3.13	741.568	LC-MS
PC(34:4)	2.58	753.529	LC-MS
PC(34:3)	2.71	755.548	LC-MS
PC(34:2)	2.95	757.563	LC-MS
PC(34:1)	3.28	759.578	LC-MS
PC(34:0)	3.77	761.593	LC-MS
PC(O-36:6)	2.8	763.551	LC-MS
PC(O-36:5)	3	765.56	LC-MS
PC(O-36:4)	3.18	767.583	LC-MS
PC(35:2)	3.15	771.584	LC-MS
PC(36:5)	2.67	779.547	LC-MS
PC(36:4)	2.89	781.562	LC-MS
PC(36:3)	3	783.578	LC-MS
PC(36:2)	3.4	785.594	LC-MS
PC(36:1)	3.86	787.608	LC-MS
PC(38:6)	2.8	805.56	LC-MS
PC(38:5)	2.91	807.577	LC-MS
PC(38:4)	3.32	809.594	LC-MS
PC(38:3)	3.55	811.602	LC-MS
PC(40:7)	2.87	831.576	LC-MS
PC(40:6)	3.2	833.589	LC-MS
PC(40:5)	3.34	835.606	LC-MS
SM(d18:1/14:0)	2.48	674.535	LC-MS
SM(d18:1/16:0)	2.78	702.569	LC-MS
SM(d18:0/16:0)	2.89	704.586	LC-MS
SM(d18:1/18:1)	2.86	728.587	LC-MS
SM(d18:1/18:0)	3.19	730.614	LC-MS
SM(d18:1/22:0)	4.52	786.662	LC-MS
SM(d18:1/24:2)	3.85	810.657	LC-MS
TG(38:0)	6.87	666.576	LC-MS
TG(40:1)	6.94	692.595	LC-MS
TG(40:0)	7.38	694.607	LC-MS
TG(42:2)	7.02	718.613	LC-MS
TG(42:1)	7.41	720.627	LC-MS
TG(42:0)	7.77	722.642	LC-MS
TG(44:3)	7.15	744.627	LC-MS
TG(44:2)	7.48	746.643	LC-MS
TG(44:1)	7.8	748.659	LC-MS
TG(44:0)	8.12	750.674	LC-MS
TG(45:1)	7.97	762.673	LC-MS
TG(46:3)	7.57	772.657	LC-MS
TG(46:2)	7.85	774.674	LC-MS
TG(46:1)	8.15	776.69	LC-MS
TG(46:0)	8.45	778.705	LC-MS
TG(47:2)	8.01	788.69	LC-MS
TG(47:0)	8.61	792.719	LC-MS
TG(48:4)	7.6	798.673	LC-MS
TG(48:3)	7.88	800.69	LC-MS
TG(48:2)	8.18	802.706	LC-MS
TG(48:1)	8.47	804.722	LC-MS
TG(48:0)	8.75	806.737	LC-MS
TG(49:3)	8.06	814.704	LC-MS
TG(49:2)	8.35	816.721	LC-MS
TG(49:1)	8.63	818.736	LC-MS
TG(49:0)	8.91	820.749	LC-MS
TG(50:4)	7.96	826.705	LC-MS
TG(50:3)	8.22	828.722	LC-MS
TG(50:2)	8.49	830.738	LC-MS
TG(50:1)	8.77	832.754	LC-MS
TG(50:0)	9.05	834.769	LC-MS
TG(51:4)	8.12	840.719	LC-MS
TG(51:3)	8.38	842.736	LC-MS
TG(51:2)	8.64	844.752	LC-MS
TG(51:1)	8.92	846.768	LC-MS
TG(52:6)	7.77	850.705	LC-MS
TG(52:5)	8.02	852.721	LC-MS
TG(52:4)	8.28	854.737	LC-MS
TG(52:3)	8.53	856.754	LC-MS
TG(52:2)	8.79	858.77	LC-MS
TG(52:1)	9.06	860.785	LC-MS
TG(52:0)	9.33	862.798	LC-MS
TG(53:4)	8.41	868.751	LC-MS
TG(53:3)	8.67	870.768	LC-MS
TG(53:2)	8.93	872.785	LC-MS
TG(53:1)	9.16	874.8	LC-MS
TG(54:7)	7.77	876.72	LC-MS
TG(54:6)	8.13	878.737	LC-MS
TG(54:5)	8.31	880.753	LC-MS
TG(54:4)	8.56	882.769	LC-MS
TG(54:3)	8.82	884.786	LC-MS
TG(54:2)	9.08	886.802	LC-MS
TG(54:1)	9.33	888.815	LC-MS
TG(54:0)	9.58	890.829	LC-MS
TG(55:3)	8.93	898.801	LC-MS
TG(56:9)	7.81	900.721	LC-MS
TG(55:2)	9.19	900.82	LC-MS
TG(56:8)	8.06	902.737	LC-MS
TG(56:7)	8.19	904.752	LC-MS
TG(56:6)	8.44	906.768	LC-MS
TG(56:5)	8.67	908.783	LC-MS
TG(56:4)	8.86	910.799	LC-MS
TG(56:3)	9.09	912.816	LC-MS
TG(56:2)	9.34	914.831	LC-MS
TG(56:1)	9.58	916.846	LC-MS
TG(56:0)	9.82	918.861	LC-MS
TG(58:10)	7.82	926.738	LC-MS
TG(58:9)	8.08	928.752	LC-MS
TG(57:2)	9.45	928.85	LC-MS
TG(58:8)	8.36	930.768	LC-MS
TG(58:7)	8.64	932.784	LC-MS
TG(58:6)	8.7	934.799	LC-MS
TG(58:4)	9.11	938.827	LC-MS
TG(58:3)	9.34	940.845	LC-MS
TG(58:2)	9.58	942.861	LC-MS
TG(58:1)	9.82	944.876	LC-MS
TG(60:3)	9.58	968.877	LC-MS
TG(60:2)	9.82	970.894	LC-MS

## Sheet: PLASMA METABOLITES AND LIPIDS
ID	DATA	Mass	RT/RI
Betaine	LC-MS	118.087	0.37
Methionine	LC-MS	149.052	0.61
Acetylcholine	LC-MS	146.118	0.39
Creatinine	LC-MS	113.059	0.38
L-Proline	LC-MS	115.064	0.4
Hypoxanthine	LC-MS	136.04	0.78
Uric acid	LC-MS	168.03	0.74
Hippuric acid	LC-MS	179.059	2.61
Caffeine	LC-MS	194.081	2.71
L-Tryptophan	LC-MS	204.091	2.04
Acetyl-carnitine (C2)	LC-MS	204.125	0.6
L-Kynurenine	LC-MS	208.086	1.5
Pantothenic Acid	LC-MS	219.112	1.79
Tiglyl-carnitine (C5:1iso)	LC-MS	244.155	2.16
Gamma-Glu-Leu	LC-MS	260.138	2.34
Hexanoyl-carnitine (C6)	LC-MS	260.186	3.23
Adenosine	LC-MS	267.098	1.36
Glutaroyl-carnitine (C5-DC)	LC-MS	276.146	1.28
Octenoyl-carnitine (C8:1)	LC-MS	286.201	3.86
Octanoyl-carnitine (C8)	LC-MS	288.218	4.05
Decenoyl-carnitine (C10:1)	LC-MS	314.233	4.39
Decanoyl-carnitine (C10)	LC-MS	316.249	4.62
Dodecenoyl-carnitine (C12:1)	LC-MS	342.264	4.85
Hydroxylauroyl-carnitine (C12:0-OH)	LC-MS	360.274	4.69
Cortisol	LC-MS	362.209	4.22
Tetradecdienoyl-carnitine (C14:2)	LC-MS	368.28	5.05
Tetradecenoyl-carnitine (C14:1)	LC-MS	370.296	5.29
Myristoyl-carnitine (C14)	LC-MS	372.311	5.51
Hydroxymyristoyl-carnitine (C14:0-OH)	LC-MS	388.306	5.15
Hexadecenoyl-carnitine (C16:1)	LC-MS	398.327	5.63
Linoleneoyl-carnitine (C18:3)	LC-MS	422.326	5.53
Linoleoyl-carnitine (C18:2)	LC-MS	424.343	5.73
Eicosadieneoyl-carnitine (C20:2)	LC-MS	452.374	6.04
Eicoseneoyl-carnitine (C20:1)	LC-MS	454.388	6.24
LPC(14:0/0:0)	LC-MS	468.31	5.83
LPC(P-16:0/0:0)	LC-MS	480.339	6.47
LLPC(O-16:0/0:0)	LC-MS	482.361	6.49
LPC(16:1/0:0)	LC-MS	494.325	5.96
LPC(16:0/0:0)	LC-MS	496.341	6.32
LPC(17:0/0:0)	LC-MS	510.357	6.55
LPC(18:2/0:0)	LC-MS	520.341	6.11
LPC(18:1/0:0)	LC-MS	522.357	6.42
LPC(18:0/0:0)	LC-MS	524.373	6.77
LPC(20:5/0:0)	LC-MS	542.325	5.84
LPC(20:4/0:0)	LC-MS	544.342	6.09
LPC(20:3/0:0)	LC-MS	546.356	6.27
LPC(22:6/0:0)	LC-MS	568.341	6.06
LPC(22:5/0:0)	LC-MS	570.356	6.19
PAF(14:0/0:0)	LC-MS	468.309	5.73
PAF(16:1/0:0)	LC-MS	494.325	5.87
PAF(16:0/0:0)	LC-MS	496.341	6.22
PAF(17:0/0:0)	LC-MS	510.355	6.4
PAF(18:2/0:0)	LC-MS	520.341	6.03
PAF(18:0/0:0)	LC-MS	524.372	6.68
PAF(20:5/0:0)	LC-MS	542.325	5.77
PAF(20:4/0:0)	LC-MS	544.341	6.03
PAF(20:3/0:0)	LC-MS	546.356	6.2
PAF(22:6/0:0)	LC-MS	568.34	5.99
L-Lactic acid (3:0-OH)	LC-MS	90.032	0.59
2-oxoisocaproic acid	LC-MS	130.063	2.56
Salicylic acid	LC-MS	138.032	3.77
Xanthine	LC-MS	152.033	0.94
Sebacic acid (C10:0-DC)	LC-MS	202.12	4.19
Myristic acid (14:0)	LC-MS	228.208	6.82
CMPF	LC-MS	240.1	4.75
cis-9-palmitoleic acid (16:1)	LC-MS	254.224	6.9
Palmitic acid (16:0)	LC-MS	256.239	7.18
DL-Hydroxypalmitic acid (16:0-OH)	LC-MS	272.234	6.8
2-Hydroxyhexadecanoic acid (16:0-OH)	LC-MS	272.234	6.8
a-Linolenic Acid (18:3)	LC-MS	278.223	6.76
Linoleic acid (18:2)	LC-MS	280.239	6.99
Oleic acid (18:1)	LC-MS	282.255	7.23
Stearic acid (18:0)	LC-MS	284.27	7.47
Abietic acid	LC-MS	302.223	6.71
Arachidonic Acid (20:4)	LC-MS	304.239	6.93
Docosahexaenoic acid (22:6)	LC-MS	328.24	6.86
3-hydroxyandrost-5-en-17-one sulfate	LC-MS	368.165	4.7
Sphingosine-1-phosphate	LC-MS	379.248	5.91
Glycodeoxycholate	LC-MS	449.313	5.49
Chenodeoxycholic acid glycine conjugate	LC-MS	449.313	5.37
LPE(16:0/0:0)	LC-MS	453.284	6.36
Glycocholic Acid	LC-MS	465.307	4.94
LPE(18:2/0:0)	LC-MS	477.285	6.15
LPE(18:1(9Z)/0:0)	LC-MS	479.3	6.46
LPE(18:0/0:0)	LC-MS	481.315	6.8
OXALIC ACID	GC-MS	192	1147
GLYCOLIC ACID	GC-MS	178	1101
LACTIC ACID	GC-MS	191	1085
FUMARIC ACID	GC-MS	246	1351
MALIC ACID	GC-MS	335	1483
TARTARIC ACID	GC-MS	293	1629
2-OXOBUTYRIC ACID	GC-MS	188	1124
3-HYDROXYBUTYRIC ACID	GC-MS	130	1177
2-OXOISOCAPROIC ACID	GC-MS	216	1191
GLYCERIC ACID	GC-MS	307	1330
CITRIC ACID	GC-MS	363	1812
NONANOIC ACID	GC-MS	215	1362
DODECANOIC ACID-TMS 1	GC-MS	258	1649
DOCOSAHEXAENOIC ACID	GC-MS	224	2553
HEXADECANOIC ACID	GC-MS	313	2044
HEPTADECANOIC ACID	GC-MS	132	2140
OCTADECANOIC ACID-TMS 1	GC-MS	357	2239
2-METHYLMALIC ACID	GC-MS	349	1468
GALACTURONIC ACID	GC-MS	364	1950
GLUCARIC ACID 1,4 LACTONE	GC-MS	347	1951
ACONITIC ACID	GC-MS	375	1743
ALANINE	GC-MS	133	1125
CYSTEINE	GC-MS	219	1550
ALLOTHREONINE	GC-MS	220	1383
ASPARAGINE	GC-MS	258	1664
HISTIDINE	GC-MS	154	1918
LYSINE	GC-MS	317	1922
CITRULLINE	GC-MS	143	1609
CYSTINE	GC-MS	411	2285
GLYCINE	GC-MS	246	1307
ISOLEUCINE	GC-MS	233	1296
LEUCINE	GC-MS	260	1276
NORVALINE	GC-MS	246	1225
ORNITHINE	GC-MS	420	1809
GLUTAMINE	GC-MS	245	1768
NORLEUCINE	GC-MS	233	1296
VALINE	GC-MS	246	1225
TAURINE	GC-MS	328	1660
THREONINE	GC-MS	320	1383
PROLINE	GC-MS	143	1300
TRYPTOPHAN	GC-MS	293	2206
TYROSINE	GC-MS	383	1936
PHENYLALANINE	GC-MS	121	1621
ALLANTOIN	GC-MS	188	1878
DOPAMINE,N,N,O,O-TMS 1	GC-MS	174	2064
O-PHOSPHOETANOLAMINE	GC-MS	415	1775
PIPECOLIC ACID	GC-MS	156	1363
4-HYDROXYPROLINE	GC-MS	332	1521
UREA	GC-MS	263	1193
2-AMINOBUTYRIC ACID	GC-MS	142	1186
PUTRESCINE	GC-MS	55	1731
PYROGLUTAMIC ACID	GC-MS	157	1517
ACETAMINOPHEN	GC-MS	296	1626
GLYCYLVALINE	GC-MS	174	1847
GAMMA-GLUTAMYLLEUCINE	GC-MS	131	2080
URIC ACID	GC-MS	458	2091
DEOXYCHOLIC ACID	GC-MS	255	3283
CAMPESTEROL	GC-MS	382	3253
CHOLESTEROL	GC-MS	354	3162
METFORMIN	GC-MS	127	1784
NAPROXEN	GC-MS	303	2084
RHAMNOSE	GC-MS	118	1717
SORBOSE	GC-MS	307	1864
1,5-ANHYDRO-D-GLUCITOL	GC-MS	257	1845
LACTOSE	GC-MS	362	2666
GALACTOSE	GC-MS	322	1916
MANNOSE	GC-MS	322	1916
MALTOSE	GC-MS	361	2727
TURANOSE	GC-MS	362	2727
ARABITOL	GC-MS	217	1712
ERYTHROSE	GC-MS	205	1474
FRUCTOSE	GC-MS	307	1864
ARABINOSE	GC-MS	307	1640
CELLOBIOSE	GC-MS	361	2678
FUCOSE	GC-MS	118	1717
GLUCOSE	GC-MS	322	1916
LYXOSE	GC-MS	307	1640
XYLOSE	GC-MS	307	1640
INOSITOL, myo	GC-MS	433	2082
RIBITOL	GC-MS	319	1712
XYLITOL	GC-MS	103	1712
ADENOSINE-5-MONOPHOSPHATE	GC-MS	316	3055
1-PALMITOYL-sn-GLYCERO-3-PHOSPHOCHOLINE	GC-MS	71	3030
1-STEAROYL-sn-GLYCERO-3-PHOSPHOCHOLINE	GC-MS	357	3219
SALICYLIC ACID	GC-MS	194	1505
Octadecanoic acid methyl ester,	GC-MS	101	2124
BETA-CYANOALANINE	GC-MS	98	1360
SARCOSINE	GC-MS	218	1125
GLUCURONIC ACID-E-LACTONE	GC-MS	161	1915
CELLOTRIOSE	GC-MS	204	3536
INOSITOL, scyllo	GC-MS	318	2019
INOSITOL, chiro	GC-MS	433	1949
2,5-DIHYDROXYPHENYLACETIC ACID	GC-MS	65	1819
3-HYDROXYISOBUTYRIC ACID	GC-MS	177	1177
ERYTHRITOL	GC-MS	307	1502
GALACTITOL	GC-MS	307	1915
SACCHARIC ACID	GC-MS	333	1991
LAMINARIBIOSE	GC-MS	361	2727
TREHALOSE	GC-MS	361	2727
GAMMA-TOCOPHEROL	GC-MS	223	2991
Caprylic acid (C8:0)	GC-MS	129	1140
Methyl carylate (C8:0, ester)	GC-MS	158	1101
Capric acid (C10:0)	GC-MS	144	1300
Myristoleic acid (C14:1, cis-9)	GC-MS	209	1705
Myristic acid (C14:0)	GC-MS	88	1719
Pentadecanoic acid (C15:0)	GC-MS	223	1811
Palmitoleic acid (C16:1, cis-9)	GC-MS	110	1903
Palmitic acid (C16:0)	GC-MS	81	1926
10Z-Heptadecenoic acid (C17:1, cis-10)	GC-MS	251	2003
Margaric acid (C17:0)	GC-MS	241	2024
alpha-Linoleic acid (C18:3, n-3)	GC-MS	194	2074
Linoleic acid (C18:2, n-6)	GC-MS	294	2092
Oleic acid (C18:1, cis-9)	GC-MS	296	2106
Elaidic acid (C18:1, trans-9)	GC-MS	151	2106
Stearic acid (C18:0)	GC-MS	144	2126
Arachidonic acid (C20:4, n-6)	GC-MS	164	2254
Eicosatrienoic Acid (C20:3, n-3)	GC-MS	222	2273
Arachidic acid (C20:0)	GC-MS	144	2328
Heneicosanoic acid (C21:0)	GC-MS	199	2428
Docosahexaenoic acid (C22:6, n-3)	GC-MS	159	2446
Docosadienoic acid (C22:2, n-6)	GC-MS	164	2497
Erucic acid (C22:1, cis-9)	GC-MS	166	2502
Docosanoic acid (C22:0)	GC-MS	144	2530
Tricosylic acid (C23:0)	GC-MS	144	2629
Nervonic acid (C24:1, n-9)	GC-MS	166	2703
Tetracosanoic acid (24:0)	GC-MS	144	2723
Eicosadienoic acid (20:2, n-6)	GC-MS	322	2294
Delta 9 (16:1/16:0)	GC-MS
PC(36:1)	LC-MS
PC(38:6)	LC-MS
TG(46:3)	LC-MS
PC(33:0)	LC-MS
TG(58:10)	LC-MS
TG(54:3)	LC-MS
TG(56:1)	LC-MS
PC(34:0)	LC-MS
TG(50:1)	LC-MS
TG(53:4)	LC-MS
TG(58:6)	LC-MS
TG(54:6)	LC-MS
TG(44:0)	LC-MS
TG(54:2)	LC-MS
DG(32:3)	LC-MS
PC(40:8)	LC-MS
LPC(22:6)	LC-MS
TG(50:0)	LC-MS
LPC(18:1)	LC-MS
TG(54:8)	LC-MS
TG(52:2)	LC-MS
TG(48:4)	LC-MS
TG(53:3)	LC-MS
PC(40:5)	LC-MS
TG(51:4)	LC-MS
TG(46:1)	LC-MS
TG(48:3)	LC-MS
TG(57:2)	LC-MS
TG(58:4)	LC-MS
TG(56:2)	LC-MS
LPC(20:3)	LC-MS
PC(36:2)	LC-MS
PC(38:7)	LC-MS
TG(56:7)	LC-MS
TG(54:9)	LC-MS
TG(42:0)	LC-MS
TG(40:0)	LC-MS
TG(60:4)	LC-MS
TG(56:6)	LC-MS
DG(36:4)	LC-MS
LPC(18:0)	LC-MS
PC(32:1)	LC-MS
TG(56:8)	LC-MS
TG(56:4)	LC-MS
TG(40:6)	LC-MS
PC(38:4)	LC-MS
TG(46:2)	LC-MS
TG(38:3)	LC-MS
TG(46:0)	LC-MS
TG(45:1)	LC-MS
TG(54:1)	LC-MS
PC(38:3)	LC-MS
TG(36:1)	LC-MS
TG(58:3)	LC-MS
TG(47:2)	LC-MS
TG(55:3)	LC-MS
TG(49:1)	LC-MS
TG(53:5)	LC-MS
TG(51:2)	LC-MS
TG(60:2)	LC-MS
TG(46:4)	LC-MS
TG(49:2)	LC-MS
TG(44:2)	LC-MS
TG(38:0)	LC-MS
TG(42:1)	LC-MS
TG(55:5)	LC-MS
DG(36:2)	LC-MS
TG(60:12)	LC-MS
TG(53:1)	LC-MS
TG(52:5)	LC-MS
PC(36:3)	LC-MS
LPC(14:0)	LC-MS
TG(51:1)	LC-MS
TG(56:3)	LC-MS
TG(36:0)	LC-MS
DG(34:2)	LC-MS
TG(58:9)	LC-MS
DG(36:0)	LC-MS
PC(35:1)	LC-MS
TG(49:0)	LC-MS
TG(44:1)	LC-MS
TG(38:1)	LC-MS
TG(48:1)	LC-MS
DG(30:0)	LC-MS
LPC(18:2)	LC-MS
TG(51:3)	LC-MS
DG(40:7)	LC-MS
LPC(O-36:2)	LC-MS
TG(50:4)	LC-MS
LPC(20:4)	LC-MS
TG(54:5)	LC-MS
PC(40:6)	LC-MS
TG(40:1)	LC-MS
PC(32:0)	LC-MS
PC(40:7)	LC-MS
PC(36:5)	LC-MS
TG(56:9)	LC-MS
TG(58:2)	LC-MS
LPC(18:3)	LC-MS
DG(38:5)	LC-MS
TG(58:11)	LC-MS
DG(38:6)	LC-MS
LPC(17:0)	LC-MS
DG(34:0)	LC-MS
PC(34:1)	LC-MS
PC(38:5)	LC-MS
TG(49:3)	LC-MS
TG(48:0)	LC-MS
TG(55:2)	LC-MS
DG(34:1)	LC-MS
PC(32:3)	LC-MS
DG(38:3)	LC-MS
DG(36:1)	LC-MS
TG(47:0)	LC-MS
TG(53:2)	LC-MS
TG(52:6)	LC-MS
TG(57:6)	LC-MS
LPC(16:0)	LC-MS
PC(35:2)	LC-MS
TG(50:2)	LC-MS
TG(60:3)	LC-MS
LPC(O-34:2)	LC-MS
DG(36:3)	LC-MS
TG(48:2)	LC-MS
TG(54:7)	LC-MS
TG(40:2)	LC-MS
TG(50:3)	LC-MS
PC(38:2)	LC-MS
TG(58:7)	LC-MS
TG(52:4)	LC-MS
TG(52:1)	LC-MS
