# Supplementary material for: Improved Peripheral and Hepatic Insulin Sensitivity after Lifestyle Interventions in Type 2 Diabetes Is Associated with Specific Metabolomic and Lipidomic Signatures in Skeletal Muscle and Plasma
Source: Metabolites. 2021 Dec 3;11(12):834. doi: 10.3390/metabo11120834 (PMC8708788; doi:10.3390/metabo11120834)
Supplement: Supplementary file 1 [file metabolites-11-00834-s001.zip › Supplementary Table 2.xlsx]

## Sheet: Blad1
Detected Cardiolipin species	Formula	Mass	Retention time
CL(70:5)	C79 H144 O17 P2	1426.99	7.56
CL(72:8)	C81 H142 O17 P2	1448.97	7.56
CL(72:8)	C81 H142 O17 P2	1448.97	7.56
CL(72:9)	C81 H140 O17 P2	1446.94	7.56
CL(72:10)	C81 H138 O17 P2	1444.94	7.51
CL(74:10)	C83 H142 O17 P2	1472.97	7.78
CL(74:11)	C83 H140 O17 P2	1470.95	7.56
CL(74:12)	C83 H138 O17 P2	1468.94	7.34
